# Supplementary material for: Adverse effects of remdesivir, hydroxychloroquine and lopinavir/ritonavir when used for COVID-19: systematic review and meta-analysis of randomised trials
Source: PubMed Central journal article supplement — BMJ Open. 2022 Mar 1;12(3):e048502. doi: 10.1136/bmjopen-2020-048502 (PMC8895418; doi:10.1136/bmjopen-2020-048502), 2022-03-01
Supplement: bmjopen-2020-048502supp001.pdf [file bmjopen-2020-048502supp001.pdf]

## Appendix

### Search sources

**WHO covid-19 database:** Medline (Ovid and PubMed), PubMed Central, Embase, CAB Abstracts, Global Health, PsycInfo, Cochrane Library, Scopus, Academic Search Complete, Africa Wide Information, CINAHL, ProQuest Central, SciFinder, the Virtual Health Library, LitCovid, WHO covid-19 website, CDC covid-19 website, Eurosurveillance, China CDC Weekly, Homeland Security Digital Library, ClinicalTrials.gov, bioRxiv (preprints), medRxiv (preprints), chemRxiv (preprints), and SSRN (preprints).

**US Centers for Disease Control and Prevention (CDC) database:** Medline (Ovid and PubMed), PubMed Central, Embase, CAB Abstracts, Global Health, PsycInfo, Cochrane Library, Scopus, Academic Search Complete, Africa Wide Information, CINAHL, ProQuest Central, SciFinder, the Virtual Health Library, LitCovid, WHO covid-19 website, CDC covid-19 website, Eurosurveillance, China CDC Weekly, Homeland Security Digital Library, ClinicalTrials.gov, bioRxiv (preprints), medRxiv (preprints), chemRxiv (preprints), and SSRN (preprints).

**Chinese databases:** Wanfang, Chinese Biomedical Literature, China National Knowledge Infrastructure, VIP, Chinese Medical Journal Net (preprints), and ChinaXiv (preprints).

### **Living Overview of the Evidence (L-OVE) COVID-19 Repository by the Epistemonikos**

**Foundation:** Pubmed/medline (updated several times a day), EMBASE (updated weekly), CINAHL (updated weekly), PsycINFO (updated weekly), LILACS (Latin American & Caribbean Health Sciences Literature) (updated weekly), Wanfang Database (updated every 2 weeks), CBM - Chinese Biomedical Literature Database (updated every 2 weeks), CNKI - Chinese National Knowledge Infrastructure (updated every 2 weeks), VIP - Chinese Scientific Journal Database (updated every 2 weeks), IRIS (WHO Institutional Repository for Information Sharing) (updated weekly), IRIS PAHO (PAHO Institutional Repository for Information Sharing) (updated weekly), IBECs - Índice Bibliográfico Español en Ciencias de la Salud (Spanish Bibliographic Index on Health Sciences) (updated weekly), Microsoft Academic (last searched: Sept 4, 2020), ICTRP Search Portal (updated daily), Clinicaltrials.gov (updated daily), ISRCTN registry (updated daily), Chinese Clinical Trial Registry (updated daily), IRCT - Iranian Registry of Clinical Trials (updated daily), EU Clinical Trials Register: Clinical trials for covid-19 (updated daily), NIPH Clinical Trials Search (Japan) - Japan Primary Registries Network (JPRN) (JapicCTI, JMACCT CTR, jRCT, UMIN CTR) (updated daily, via ICTRP search portal), UMIN-CTR - UMIN Clinical Trials Registry (updated daily, via ICTRP search portal), JRCT - Japan Registry of Clinical Trials (updated daily, via ICTRP search portal), JAPIC Clinical Trials Information (updated daily, via ICTRP search portal), Clinical Research Information Service (CRiS), Republic of Korea (updated daily, via ICTRP search portal), ANZCTR - Australian New Zealand Clinical Trials Registry (updated daily, via ICTRP search portal), ReBec - Brazilian Clinical Trials Registry (updated daily, via ICTRP search portal), CTRI - Clinical Trials Registry - India (updated daily, via ICTRP search portal), RPCEC - Cuban Public Registry of Clinical Trials (updated daily, via ICTRP search portal), DRKS - German Clinical Trials Register (updated daily, via ICTRP search portal), LBCTR - Lebanese Clinical Trials Registry (updated daily, via ICTRP search portal), TCTR - Thai Clinical Trials Registry (updated daily, via ICTRP search portal), NTR - The Netherlands National Trial Register (updated daily, via ICTRP search portal), PACTR - Pan African Clinical Trial Registry

(updated daily, via ICTRP search portal), REPEC - Peruvian Clinical Trial Registry (updated daily, via ICTRP search portal), SLCTR - Sri Lanka Clinical Trials Registry (updated daily, via ICTRP search portal), medRxiv (updated several times a day), bioRxiv (updated several times a day), SSRN Preprints (updated several times a day), ChinaXiv (updated every 2 weeks), SciELO Preprints (updated weekly), Research Square (updated daily)

## Search strategies

## Daily Searches

| Database                                  | Search strategy                                                                                                                                                                                                                                                                                                                                                                                                                                          |
|-------------------------------------------|----------------------------------------------------------------------------------------------------------------------------------------------------------------------------------------------------------------------------------------------------------------------------------------------------------------------------------------------------------------------------------------------------------------------------------------------------------|
| Medline<br>(Ovid)<br>1946-                | (coronavir* OR corona virus* OR corona pandemic* OR betacoronavir* OR covid19 OR covid OR nCoV OR novel CoV OR CoV 2 OR CoV2 OR sarscov2 OR sars2 OR 2019nCoV OR wuhan virus*).mp. OR (sars AND cov).mp. OR ((wuhan OR hubei OR huanan) AND (severe acute respiratory OR pneumonia*) AND outbreak*).mp. OR Coronavirus Infections/ OR Coronavirus/ OR betacoronavirus/<br><br>Limits: 2020-                                                              |
| CAB<br>Abstracts<br>(Ovid)<br>1910-       | (coronavir* OR corona virus* OR corona pandemic* OR betacoronavir* OR covid19 OR covid OR nCoV OR novel CoV OR CoV 2 OR CoV2 OR sarscov2 OR sars2 OR 2019nCoV OR wuhan virus*).mp. OR (sars AND cov).mp. OR ((wuhan OR hubei OR huanan) AND (severe acute respiratory OR pneumonia*) AND outbreak*).mp. OR exp Betacoronavirus/                                                                                                                          |
| Global<br>Health<br>(Ovid)<br>1910-       | (coronavir* OR corona virus* OR corona pandemic* OR betacoronavir* OR covid19 OR covid OR nCoV OR novel CoV OR CoV 2 OR CoV2 OR sarscov2 OR sars2 OR 2019nCoV OR wuhan virus*).mp. OR (sars AND cov).mp. OR ((wuhan OR hubei OR huanan) AND (severe acute respiratory OR pneumonia*) AND outbreak*).mp. OR exp Betacoronavirus/                                                                                                                          |
| PsycInfo<br>(Ovid)<br>1806-               | (coronavir* OR corona virus* OR corona pandemic* OR betacoronavir* OR covid19 OR covid OR nCoV OR novel CoV OR CoV 2 OR CoV2 OR sarscov2 OR sars2 OR 2019nCoV OR wuhan virus*).mp. OR (sars AND cov).mp. OR ((wuhan OR hubei OR huanan) AND (severe acute respiratory OR pneumonia*) AND outbreak*).mp.<br><br>Limits: 2020-                                                                                                                             |
| Scopus<br>1960-                           | TITLE-ABS-KEY ( coronavir* OR "corona virus" OR "corona pandemic" OR betacoronavir* OR covid19 OR covid OR nCoV OR "CoV 2" OR cov2 OR sarscov2 OR sars2 OR 2019ncov OR "novel CoV" OR "wuhan virus" ) OR TITLE-ABS-KEY(sars AND cov) OR ( TITLE-ABS-KEY ( wuhan OR hubei OR huanan ) AND TITLE-ABS-KEY ( "severe acute respiratory" OR pneumonia* ) AND TITLE-ABS-KEY ( outbreak* ) ) AND ( LIMIT-TO ( PUBYEAR , 2021 ) OR LIMIT-TO ( PUBYEAR , 2020 ) ) |
| Academic<br>Search<br>Complete<br>(Ebsco) | TI,AB,SU( ( coronavir* OR "corona virus" OR "corona pandemic" OR betacoronavir* OR covid19 OR covid OR nCoV OR "CoV 2" OR cov2 OR sarscov2 OR sars2 OR 2019ncov OR "novel CoV" OR "wuhan virus" ) OR (sars AND cov) OR ( ( wuhan OR hubei OR huanan ) AND ( "severe acute respiratory" OR pneumonia* ) AND ( outbreak* ) ) )                                                                                                                             |

|                                                                                                                           |                                                                                                                                                                                                                                                                                                                                                                                                                                    |
|---------------------------------------------------------------------------------------------------------------------------|------------------------------------------------------------------------------------------------------------------------------------------------------------------------------------------------------------------------------------------------------------------------------------------------------------------------------------------------------------------------------------------------------------------------------------|
|                                                                                                                           | Limits: Dec. 2019-, peer-reviewed                                                                                                                                                                                                                                                                                                                                                                                                  |
| Africa Wide Information (Ebsco)                                                                                           | TI,AB,SU( ( coronavir* OR "corona virus" OR "corona pandemic" OR betacoronavir* OR covid19 OR covid OR ncov OR "CoV 2" OR cov2 OR sarscov2 OR sars2 OR 2019ncov OR "novel CoV" OR "wuhan virus" ) OR (sars AND cov) OR ( ( wuhan OR hubei OR huanan ) AND ( "severe acute respiratory" OR pneumonia* ) AND ( outbreak* ) ) )<br><br>Limits: 2019-,                                                                                 |
| CINAHL (Ebsco)                                                                                                            | TI,AB,SU( ( coronavir* OR "corona virus" OR "corona pandemic" OR betacoronavir* OR covid19 OR covid OR ncov OR "CoV 2" OR cov2 OR sarscov2 OR sars2 OR 2019ncov OR "novel CoV" OR "wuhan virus" ) OR (sars AND cov) OR ( ( wuhan OR hubei OR huanan ) AND ( "severe acute respiratory" OR pneumonia* ) AND ( outbreak* ) ) ) OR ( (MH "Coronavirus") OR (MH "Coronavirus Infections") ) )<br><br>Limits: Dec. 2019-, peer-reviewed |
| ProQuest Central (Proquest) 1952-                                                                                         | TI,AB,SU( ( coronavir* OR "corona virus" OR "corona pandemic" OR betacoronavir* OR covid19 OR covid OR ncov OR "CoV 2" OR cov2 OR sarscov2 OR sars2 OR 2019ncov OR "novel CoV" OR "wuhan virus" ) OR (sars AND cov) OR ( ( wuhan OR hubei OR huanan ) AND ( "severe acute respiratory" OR pneumonia* ) AND ( outbreak* ) ) )<br><br>Limits: Dec. 2019-, peer-reviewed                                                              |
| <a href="#">China CDC MMWR</a>                                                                                            | Covid OR cov2 OR coronavirus OR "sars cov" OR ncov                                                                                                                                                                                                                                                                                                                                                                                 |
| <a href="#">CDC Reports</a>                                                                                               | Covid OR cov2 OR coronavirus OR "sars cov" OR ncov                                                                                                                                                                                                                                                                                                                                                                                 |
| <a href="#">bioRxiv</a><br><a href="#">medRxiv</a><br><a href="#">chemRxiv</a><br><a href="#">SSRN</a><br><br>(preprints) | Covid OR cov2 OR coronavirus OR "sars cov" OR ncov                                                                                                                                                                                                                                                                                                                                                                                 |

|                      |                                                                                                                                                                                                                                                                                                                                                                                                                                                                                                                                                                                                                                                                                                                                                                                                                                                                                                                                                                                                                                                                                                   |
|----------------------|---------------------------------------------------------------------------------------------------------------------------------------------------------------------------------------------------------------------------------------------------------------------------------------------------------------------------------------------------------------------------------------------------------------------------------------------------------------------------------------------------------------------------------------------------------------------------------------------------------------------------------------------------------------------------------------------------------------------------------------------------------------------------------------------------------------------------------------------------------------------------------------------------------------------------------------------------------------------------------------------------------------------------------------------------------------------------------------------------|
| Embase<br>(Ovid)     | ncov OR (('coronavirus'/exp OR coronavirus) AND ('wuhan'/exp OR wuhan)) OR 'novel coronavirus' OR (('pneumonia'/exp OR pneumonia) AND wuhan:ti,ab) OR 'covid' OR 2019ncov OR 'sars-cov'/exp OR 'sars-cov' OR covid OR (('coronavirus'/exp OR coronavirus) AND novel) OR (('corona virus':ti,ab OR 'coronavirus':ti,ab) AND (outbreak:ti,ab OR epidemic*:ti,ab OR pandemic*:ti,ab OR quaran*:ti,ab OR lockdown*:ti,ab OR syndemic*:ti,ab)) OR hcov OR 'sars virus'/exp OR 'sars virus' OR 'coronavirus disease 2019'/exp OR 'coronavirus disease 2019' OR 'novel coronavirus pneumonia' OR 'covid 19 virus' OR 'severe acute respiratory syndrome coronavirus 2'/exp OR 'severe acute respiratory syndrome coronavirus 2' OR 'coronavirinae'/exp OR 'coronavirinae' OR 'coronavirus infection'/exp OR 'coronavirus infection' OR 'covid19'/exp OR covid19 OR covid2019 OR 'corona pandemic' OR 'sarscov 2' OR 'sarscov-2' OR 'sars co v 2' OR 'social distancing'/exp OR 'social distancing' OR coivd OR 'flatten the curve' OR 'flattening the curve' OR pandoeconom* OR twindemic* OR 'sars voc' |
| Global Index Medicus | (nCov OR (coronavirus AND wuhan) OR "novel coronavirus" OR (pneumonia AND wuhan) OR covid OR 2019ncov OR "sars-cov " OR covid OR (coronavirus AND novel) OR ("corona virus" OR coronavirus ) AND ( ti:outbreak OR ti:epidemic* OR ti:pandemic* OR ti:quaran* OR ti:sydem* OR hcov OR "sars virus")) OR "coronavirus disease 2019" OR " novel coronavirus pneumonia" OR "COVID 19 virus" OR "severe acute respiratory syndrome coronavirus 2" OR Coronavirinae OR "Coronavirus infection" OR covid19 OR covid2019 OR lockdown* OR "social distancing" OR "physical distancing" OR "corona pandemic" OR "sarscov 2" OR "sarscov-2" OR "sars co v 2" OR coivd OR "flatten the curve" OR "flattening the curve" OR "sars voc")                                                                                                                                                                                                                                                                                                                                                                        |
| Web of Science       | TI=coronavirus OR TI=covid OR TI=Covid19 OR TI=ncov OR TI=(SARS NEAR/3 COV) OR TI="novel coron*virus" OR TI=2019*nCoV OR TI=2019ncov OR TI=(CORON*VIRUS NEAR/3 (OUTBREAK OR pandemic OR 2019 OR new OR novel)) OR TI=coronavirinae OR TI=coronaviridae OR TI=betacoronavirus OR TI=Sars2 OR TI=COV2 OR TI="corona pandemic" OR ((TI=wuhan OR TI=hubei OR TI=huanan) AND ( TI="severe acute respiratory" OR TI=pneumonia ) AND (TI=outbreak))                                                                                                                                                                                                                                                                                                                                                                                                                                                                                                                                                                                                                                                      |
| PubMed Central       | coronavirus[Title] OR "corona virus" [Title] OR "corona pandemic"[Title] OR coronavirinae[Title] OR coronaviridae[Title] OR betacoronavirus[Title] OR covid19[Title] OR covid[Title] OR nCoV[Title] OR "CoV 2"[Title] OR CoV2[Title] OR sars2[Title] OR sarscov2[Title] OR 2019nCoV[Title] OR "novel CoV"[Title] OR "wuhan virus"[Title] OR coronavirus[Abstract] OR "corona virus" [Abstract] OR "corona pandemic"[Abstract] OR coronavirinae[Abstract] OR coronaviridae[Abstract] OR betacoronavirus[Abstract] OR covid19[Abstract] OR covid[Abstract] OR nCoV[Abstract] OR "CoV 2"[Abstract] OR CoV2[Abstract] OR sars2[Abstract] OR sarscov2[Abstract] OR 2019nCoV[Abstract] OR "novel CoV"[Abstract] OR "wuhan virus"[Abstract] OR "COVID-19" [Supplementary Concept] OR "severe acute respiratory syndrome coronavirus 2"                                                                                                                                                                                                                                                                   |

|                |                                                                                                                                                                                                                                                                                                                        |
|----------------|------------------------------------------------------------------------------------------------------------------------------------------------------------------------------------------------------------------------------------------------------------------------------------------------------------------------|
|                | [Supplementary Concept] OR ((wuhan[Title] OR hubei[Title] OR huanan[Title]) OR (wuhan[Abstract] OR hubei[Abstract] OR huanan[Abstract]) AND ("severe acute respiratory"[Title] OR pneumonia[Title])) OR (("severe acute respiratory"[Abstract] OR pneumonia[Abstract]) AND (outbreak[Title] OR outbreak[Abstract]))    |
| Science Direct | COVID OR COVID19 OR 2019Ncov OR Ncov OR Coronavirus OR "corona virus" OR (SARS AND Cov)                                                                                                                                                                                                                                |
| Wiley Online   | COVID-19 OR nCov OR 2019ncov OR (pneumonia AND wuhan) OR (sars AND cov) OR COVID OR Covid19 OR "corona virus" OR coronavirus OR COV2 OR SARS2 OR coronavirinae OR coronaviridae OR betacoronavirus OR "corona pandemic" OR ((wuhan OR hubei OR huanan) AND ( "severe acute respiratory" OR pneumonia ) AND (outbreak)) |

## Weekly, Biweekly or Monthly Searches

| Database                           | Search strategy                                                                                                                                                                                                                                                                                                                                                                                                                                                                                                                                                                                                                                                                                                                                                                                                                                                                                                                                  |
|------------------------------------|--------------------------------------------------------------------------------------------------------------------------------------------------------------------------------------------------------------------------------------------------------------------------------------------------------------------------------------------------------------------------------------------------------------------------------------------------------------------------------------------------------------------------------------------------------------------------------------------------------------------------------------------------------------------------------------------------------------------------------------------------------------------------------------------------------------------------------------------------------------------------------------------------------------------------------------------------|
| Eurosurveillance (weekly)          | Hand search                                                                                                                                                                                                                                                                                                                                                                                                                                                                                                                                                                                                                                                                                                                                                                                                                                                                                                                                      |
| American Chemical Society (weekly) | ncov OR coronavirus OR covid OR 2019ncov OR (SARS AND COV) OR covid19 OR covid2019 OR hcov OR "corona virus"                                                                                                                                                                                                                                                                                                                                                                                                                                                                                                                                                                                                                                                                                                                                                                                                                                     |
| Scielo (Web of Science) (weekly)   | TS=nCov OR TS=(coronavirus AND wuhan) OR TS="novel coronavirus" OR TS="nuevo coronavirus" OR TS=((pneumonia OR neumonía) OR AND wuhan) OR TS=covid OR TS=2019ncov OR TS="sars-cov" OR TS=(coronavirus AND novel) OR ((TI="corona virus" OR TI=coronavirus) AND TS=(Wuhan OR outbreak OR epidemic* OR pandemic* OR quaran* OR lockdown* OR Syndemic* OR surto* OR epidemia* OR pandêmica* OU bloqueio* OR brote* OR epidemia* OR pandêmica* OR cuaranatin*OR encierro*)) OR TS=hcov OR TS="sars virus" OR TS="coronavirus disease 2019" OR TS="Enfermedad por coronavirus 2019" OR TS="novel coronavirus pneumonia" OR TS="Nova Pneumonia por Coronavírus" OR TS="severe acute respiratory syndrome coronavirus 2" OR TS=Coronavirinae OR TS="Coronavirus infection" OR TS="infecções por coronavirus" OR TS=covid19 OR TS=covid2019 OR TS="corona pandemic" OR TS="sarscov 2" OR TS="sarscov-2" OR TS="sars co v 2" OR TS="social distancing" OR |

|                                                          |                                                                                                                                                                                                                                                                                                                                                                                                                                                                                                                                                                                                                                                                                                                                                                                                                    |
|----------------------------------------------------------|--------------------------------------------------------------------------------------------------------------------------------------------------------------------------------------------------------------------------------------------------------------------------------------------------------------------------------------------------------------------------------------------------------------------------------------------------------------------------------------------------------------------------------------------------------------------------------------------------------------------------------------------------------------------------------------------------------------------------------------------------------------------------------------------------------------------|
|                                                          | TS= covid OR TS="flatten the curve" OR TS="flattening the curve" OR TS=pandoeconom* OR TS=twindemic* OR TS="Distanciamento social" OR TS="distancias sociales" OR TS="isolamento social" OR TS=confinamiento* OR TS=contenção*                                                                                                                                                                                                                                                                                                                                                                                                                                                                                                                                                                                     |
| <a href="#">AIRITI</a><br>(monthly)                      | (( "武漢肺炎" OR "新冠病毒" OR "2019新型冠狀病毒病" OR "新型冠狀病毒肺炎" OR covid OR coronavirus OR corona OR hcov OR ncov OR covid2019 OR covid19 OR 2019covid)) = All Fields                                                                                                                                                                                                                                                                                                                                                                                                                                                                                                                                                                                                                                                           |
| <a href="#">JMIR</a><br>(monthly)                        | covid OR Ncov OR hcov OR corona OR coronavirus OR sars OR 2019ncov OR covid19 OR covid2019<br><br>Exclude PMC articles                                                                                                                                                                                                                                                                                                                                                                                                                                                                                                                                                                                                                                                                                             |
| Russian Science Index (Web of Science) (monthly)         | TS=nCov OR TS=(coronavirus AND wuhan) OR TS="novel coronavirus" OR TS=(pneumonia AND wuhan) OR TS=covid OR TS=2019ncov OR TS="sars-cov" OR TS=(coronavirus AND novel) OR ((TI="corona virus" OR TI=coronavirus) AND (TS=Wuhan OR TS=outbreak OR TS=epidemic* OR TS=pandemic* OR TS=quaran* OR TS=lockdown* OR TS=Syndemic*)) OR TS=hcov OR TS="sars virus" OR TS="coronavirus disease 2019" OR TS="novel coronavirus pneumonia" OR TS="severe acute respiratory syndrome coronavirus 2" OR TS=Coronavirinae OR TS="Coronavirus infection" OR TS=covid19 OR TS=covid2019 OR TS="corona pandemic" OR TS="sarscov 2" OR TS="sarscov- 2" OR TS="sars co v 2" OR TS="social distancing" OR TS= covid OR TS="flatten the curve" OR TS="flattening the curve" OR TS=pandoeconom* OR TS=twindemic*<br><br>TS= коронавирус* |
| Korean Science Citation Index (Web of Science) (monthly) | TS=nCov OR TS=(coronavirus AND wuhan) OR TS="novel coronavirus" OR TS=(pneumonia AND wuhan) OR TS=covid OR TS=2019ncov OR TS="sars-cov" OR TS=(coronavirus AND novel) OR ((TI="corona virus" OR TI=coronavirus) AND (TS=Wuhan OR TS=outbreak OR TS=epidemic* OR TS=pandemic* OR TS=quaran* OR TS=lockdown* OR TS=Syndemic*)) OR TS=hcov OR TS="sars virus" OR TS="coronavirus disease 2019" OR TS="novel coronavirus pneumonia" OR TS="severe acute respiratory syndrome coronavirus 2" OR TS=Coronavirinae OR TS="Coronavirus infection" OR TS=covid19 OR TS=covid2019 OR TS="corona pandemic" OR TS="sarscov 2" OR TS="sarscov- 2" OR TS="sars co v 2" OR TS="social distancing" OR TS= covid OR TS="flatten the curve" OR TS="flattening the curve" OR TS=pandoeconom* OR TS=twindemic*                         |

|                                  |                                                                                                                                                                                                                                                                                                                                                                                                                                                                                                                             |
|----------------------------------|-----------------------------------------------------------------------------------------------------------------------------------------------------------------------------------------------------------------------------------------------------------------------------------------------------------------------------------------------------------------------------------------------------------------------------------------------------------------------------------------------------------------------------|
|                                  | TS="코로나" OR TS="코로나2019 " OR TS="코로나19" OR TS="코로나바이러스" OR TS="코로나바이러스 2019" OR TS="코로나바이러스 19 " OR TS="사스" OR TS=" 전염병"                                                                                                                                                                                                                                                                                                                                                                                                    |
| Oxford Academic Group (biweekly) | Covid OR Coronavirus OR SARS OR NcoV                                                                                                                                                                                                                                                                                                                                                                                                                                                                                        |
| Jstage (biweekly)                | Covid OR Coronavirus                                                                                                                                                                                                                                                                                                                                                                                                                                                                                                        |
| Mary Ann Liebert (biweekly)      | "2019ncov" OR nCov OR (pneumonia AND wuhan) OR "corona virus" OR SARS OR COVID OR CORONAVIRUS                                                                                                                                                                                                                                                                                                                                                                                                                               |
| Sage Publications (biweekly)     | [All "2019ncov"] OR [All ncov] OR [[All pneumonia] AND [All wuhan]] OR [All "corona virus"] OR [All sars] OR [All covid] OR [All coronavirus ] OR [All sars2] OR [All cov2] OR [All "corona pandemic"] OR [All coronavirinae] OR [All coronaviridae] OR [All betacoronavirus]                                                                                                                                                                                                                                               |
| Taylor and Francis (biweekly)    | [Publication Title: coronavirus] OR [Publication Title: "corona virus"] OR [Publication Title: covid] OR [Publication Title: ncov] OR [Publication Title: 2019ncov] OR [[Publication Title: pneumonia] AND [Publication Title: wuhan]] OR [[Publication Title: sars] AND [Publication Title: cov]] OR [Publication Title: coronavirinae] OR [Publication Title: coronaviridae] OR [Publication Title: betacoronavirus] OR [Publication Title: sars2] OR [Publication Title: cov2] OR [Publication Title: "corona pandemic"] |
| BioMed Central (biweekly)        | 'COVID-19 OR Coronavirus OR "corona virus" OR covid OR nCov OR 2019nCov OR (pneumonia AND wuhan) OR (SARS AND COV) OR coronavirinae OR coronaviridae OR betacoronavirus OR SARS2 OR COV2 O "corona pandemic"                                                                                                                                                                                                                                                                                                                |
| MDPI (biweekly)                  | 2019ncov OR nCov OR COVID OR coronavirus OR "corona virus" OR (pneumonia AND wuhan) OR (SARS AND COV) OR COVID-19 OR Sars-Cov-2 OR Cov2 OR SARS2 OR coronavirinae OR coronaviridae OR betacoronavirus OR "corona pandemic"                                                                                                                                                                                                                                                                                                  |

## Search Strategy for Chinese Databases (中文数据库检索策略及结果)

| Database                                 | Search strategy                                                                                                                                                                                                                                                                                                                                                                                                                                              |
|------------------------------------------|--------------------------------------------------------------------------------------------------------------------------------------------------------------------------------------------------------------------------------------------------------------------------------------------------------------------------------------------------------------------------------------------------------------------------------------------------------------|
| WanFang 万方医学<br>(med.wanfangdata.com.cn) | #1 (主题:(2019冠状病毒 OR 新型冠状病毒 OR 新冠肺炎)*主题:(临床试验 OR 系统评价 OR Meta分析 OR 随机对照实验 OR 对照研究))*Date:2019-<br>#2 (主题:(2019-nCoV OR SARS-CoV-2 OR Novel coronavirus OR nCoV OR new coronavirus)*主题:(临床试验 OR 系统评价 OR Meta分析 OR 随机对照实验 OR 对照研究))*Date:2019-<br>#3 #1 OR #2                                                                                                                                                                                                   |
| CBM                                      | <u>((("2019冠状病毒"[常用字段:智能] OR "新型冠状病毒"[常用字段:智能] OR "新冠肺炎"[常用字段:智能] OR "2019-nCoV"[常用字段:智能] OR "SARS-CoV-2"[常用字段:智能] OR "Novel coronavirus"[常用字段:智能] OR "nCoV"[常用字段:智能] OR "Emerging Coronaviruses"[常用字段:智能] OR "new coronavirus"[常用字段:智能] OR "COVID-19"[常用字段:智能] OR "coronavirus"[常用字段:智能] AND ("Wuhan"[常用字段] OR "Hubei"[常用字段] OR "China"[常用字段])) AND 2019-2020[日期]) AND ("循证文献"[文献类型] OR "临床试验"[文献类型] OR "随机对照试验"[文献类型] OR "综述"[文献类型] OR "Meta分析"[文献类型])</u> |
| CNKI                                     | 在期刊文献类型下：<br>#1主题=( <u>"2019冠状病毒" OR "新型冠状病毒" OR "新冠肺炎"</u> ) AND (主题=临床试验 OR 系统评价 OR 随机对照实验 OR Meta分析)<br>#2主题=( <u>2019-nCoV OR SARS-CoV-2 OR Novel coronavirus OR nCoV</u> ) AND (主题=临床试验 OR 系统评价 OR 随机对照实验 OR Meta分析)<br>2019-[日期]                                                                                                                                                                                                                       |
| VIP 维普                                   | #1 (主题:(2019冠状病毒 OR 新型冠状病毒 OR 新冠肺炎)*主题:(临床试验 OR 系统评价 OR Meta分析 OR 随机对照实验 OR 对照研究))*<br>#2 主题=( <u>SARS-CoV-2 OR Novel coronavirus OR nCoV</u> ) AND (主题=临床试验 OR 系统评价 OR 随机对照实验 OR Meta分析)                                                                                                                                                                                                                                                                    |

|                                                                                                              |                                                                                                                                                                                                            |
|--------------------------------------------------------------------------------------------------------------|------------------------------------------------------------------------------------------------------------------------------------------------------------------------------------------------------------|
|                                                                                                              | Date:2019-                                                                                                                                                                                                 |
| 中华医学期刊网 (预印本)<br><a href="http://medjournals.cn/2019NCP/index.do">http://medjournals.cn/2019NCP/index.do</a> | #1主题=("2019冠状病毒" OR "新型冠状病毒" OR "新冠肺炎")<br>AND (主题=临床试验 OR 系统评价 OR 随机对照实验 OR Meta分析)<br>#2主题=(2019-nCoV OR SARS-CoV-2 OR Novel coronavirus OR nCoV) AND (主题=临床试验 OR 系统评价 OR 随机对照实验 OR Meta分析)<br>2019-[日期] |
| 中科院预印本<br><a href="http://chinaxiv.org/home.htm">http://chinaxiv.org/home.htm</a>                            | Hand search.                                                                                                                                                                                               |
