# Supplementary material for: Adverse effects of remdesivir, hydroxychloroquine and lopinavir/ritonavir when used for COVID-19: systematic review and meta-analysis of randomised trials
Source: PubMed Central journal article supplement — BMJ Open. 2022 Mar 1;12(3):e048502. doi: 10.1136/bmjopen-2020-048502 (PMC8895418; doi:10.1136/bmjopen-2020-048502), 2022-03-01
Supplement: bmjopen-2020-048502supp003.pdf [file bmjopen-2020-048502supp003.pdf]

**Supplementary Table 1.** Summary of findings table (sensitivity analysis using Peto's method)

| Outcome<br>Timeframe                  | Study results and<br>measurements                                                            | Absolute effect estimates                                           |                        | Certainty of the<br>Evidence<br>(Quality of evidence)                             | Plain text<br>summary                                                                                    |
|---------------------------------------|----------------------------------------------------------------------------------------------|---------------------------------------------------------------------|------------------------|-----------------------------------------------------------------------------------|----------------------------------------------------------------------------------------------------------|
|                                       |                                                                                              | Standard care                                                       | Intervention           |                                                                                   |                                                                                                          |
| <b>Remdesivir</b>                     |                                                                                              |                                                                     |                        |                                                                                   |                                                                                                          |
| Acute kidney<br>injury                | Odds Ratio: 0.86<br>(CI 95% 0.51 - 1.43)<br>Based on data from 1281<br>patients in 2 studies | <b>56</b><br>per 1000                                               | <b>49</b><br>per 1000  | <b>Low</b><br>Due to serious imprecision<br>and serious indirectness <sup>1</sup> | Remdesivir may have<br>little or no effect on<br>acute kidney injury.                                    |
|                                       |                                                                                              | Difference: <b>7 fewer per 1000</b><br>(CI 95% 27 fewer - 22 more)  |                        |                                                                                   |                                                                                                          |
| Cognitive<br>dysfunction/deliri<br>um | Odds Ratio: 1.22<br>(CI 95% 0.48 - 3.08)<br>Based on data from 1048<br>patients in 1 studies | <b>16</b><br>per 1000                                               | <b>19</b><br>per 1000  | <b>Low</b><br>Due to serious imprecision<br>and serious indirectness <sup>2</sup> | Remdesivir may have<br>little or no effect on<br>cognitive<br>dysfunction/delirium.                      |
|                                       |                                                                                              | Difference: <b>3 more per 1000</b><br>(CI 95% 8 fewer - 32 more)    |                        |                                                                                   |                                                                                                          |
| Fatigue                               | NR                                                                                           | NR                                                                  | NR                     | <b>NA</b>                                                                         | NA                                                                                                       |
|                                       |                                                                                              | NR                                                                  | NR                     |                                                                                   |                                                                                                          |
| <b>Hydroxychloroquine</b>             |                                                                                              |                                                                     |                        |                                                                                   |                                                                                                          |
| Cardiac toxicity                      | Odds Ratio: 1.35<br>(CI 95% 0.96 - 1.91)<br>Based on data from 3287<br>patients in 7 studies | <b>46</b><br>per 1000                                               | <b>61</b><br>per 1000  | <b>Low</b><br>Due to serious imprecision<br>and risk of bias <sup>3</sup>         | Hydroxychloroquine<br>may increase the risk<br>of cardiac toxicity,<br>including serious<br>arrhythmias. |
|                                       |                                                                                              | Difference: <b>15 more per 1000</b><br>(CI 95% 2 fewer - 38 more)   |                        |                                                                                   |                                                                                                          |
| Diarrhoea                             | Odds Ratio: 1.96<br>(CI 95% 1.42 - 2.72)<br>Based on data from 979<br>patients in 6 studies  | <b>149</b><br>per 1000                                              | <b>255</b><br>per 1000 | <b>Moderate</b><br>Due to serious imprecision <sup>4</sup>                        | Hydroxychloroquine<br>probably increases<br>the risk of diarrhoea.                                       |
|                                       |                                                                                              | Difference: <b>106 more per 1000</b><br>(CI 95% 50 more - 174 more) |                        |                                                                                   |                                                                                                          |
| Nausea and/or<br>vomiting             | Odds Ratio: 1.75<br>(CI 95% 1.27 - 2.41)<br>Based on data from 1429<br>patients in 7 studies | <b>99</b><br>per 1000                                               | <b>161</b><br>per 1000 | <b>Moderate</b><br>Due to serious imprecision <sup>4</sup>                        | Hydroxychloroquine<br>probably increases<br>the risk of nausea and<br>vomiting.                          |
|                                       |                                                                                              | Difference: <b>62 more per 1000</b><br>(CI 95% 23 more - 110 more)  |                        |                                                                                   |                                                                                                          |
| Cognitive<br>dysfunction/deliri<br>um | Odds Ratio: 1.57<br>(CI 95% 0.77 - 3.2)<br>Based on data from 423<br>patients in 1 studies   | <b>62</b><br>per 1000                                               | <b>94</b><br>per 1000  | <b>Low</b><br>Due to serious imprecision<br>and serious indirectness <sup>2</sup> | Hydroxychloroquine<br>may increase<br>cognitive<br>dysfunction/delirium                                  |
|                                       |                                                                                              | Difference: <b>32 more per 1000</b><br>(CI 95% 14 fewer - 113 more) |                        |                                                                                   |                                                                                                          |
| Fatigue                               | Odds Ratio: 6.75<br>(CI 95% 0.41 - 111.3)                                                    | <b>54</b><br>per 1000                                               | <b>278</b><br>per 1000 | <b>Very Low</b>                                                                   | The effect of<br>Hydroxychloroquine                                                                      |
|                                       |                                                                                              | NR                                                                  | NR                     |                                                                                   |                                                                                                          |

|                                             |                                                                                           |                                                                      |                        |                                                                                          |                                                                                           |
|---------------------------------------------|-------------------------------------------------------------------------------------------|----------------------------------------------------------------------|------------------------|------------------------------------------------------------------------------------------|-------------------------------------------------------------------------------------------|
|                                             | Based on data from 180 patients in 2 studies                                              | Difference: <b>224 more per 1000</b><br>(CI 95% 31 fewer - 810 more) |                        | Due to very serious imprecision and serious risk of bias <sup>6</sup>                    | on fatigue is uncertain                                                                   |
| <b>Hydroxychloroquine with azithromycin</b> |                                                                                           |                                                                      |                        |                                                                                          |                                                                                           |
| Cardiac toxicity                            | Odds Ratio: 2.06<br>(CI 95% 0.28 - 15.07)<br>Based on data from 667 patients in 1 studies | <b>6</b><br>per 1000                                                 | <b>12</b><br>per 1000  | <b>Very Low</b><br>Due to very serious imprecision and serious risk of bias <sup>6</sup> | The effect of Hydroxychloroquine with azithromycin on cardiac toxicity is uncertain       |
|                                             |                                                                                           | Difference: <b>6 more per 1000</b><br>(CI 95% 4 fewer - 77 more)     |                        |                                                                                          |                                                                                           |
| Nausea and/or vomiting                      | Odds Ratio: 1.47<br>(CI 95% 0.39 - 5.58)<br>Based on data from 667 patients in 1 studies  | <b>17</b><br>per 1000                                                | <b>25</b><br>per 1000  | <b>Very Low</b><br>Due to very serious imprecision and serious risk of bias <sup>6</sup> | The effect of Hydroxychloroquine with azithromycin on nausea and/or vomiting is uncertain |
|                                             |                                                                                           | Difference: <b>8 more per 1000</b><br>(CI 95% 10 fewer - 71 more)    |                        |                                                                                          |                                                                                           |
| Diarrhoea                                   | NR                                                                                        | NR                                                                   |                        | NA                                                                                       | NA                                                                                        |
|                                             |                                                                                           | NR                                                                   |                        |                                                                                          |                                                                                           |
| Cognitive dysfunction/delirium              | NR                                                                                        | NR                                                                   |                        | NA                                                                                       | NA                                                                                        |
|                                             |                                                                                           | NR                                                                   |                        |                                                                                          |                                                                                           |
| Fatigue                                     | NR                                                                                        | NR                                                                   |                        | NA                                                                                       | NA                                                                                        |
|                                             |                                                                                           | NR                                                                   |                        |                                                                                          |                                                                                           |
| <b>Lopinavir/ritonavir</b>                  |                                                                                           |                                                                      |                        |                                                                                          |                                                                                           |
| Acute kidney injury                         | Odds Ratio: 0.52<br>(CI 95% 0.14 - 1.98)<br>Based on data from 259 patients in 2 studies  | <b>45</b><br>per 1000                                                | <b>24</b><br>per 1000  | <b>Very Low</b><br>Due to very serious imprecision and serious risk of bias <sup>6</sup> | The effect of lopinavir/ritonavir on acute kidney injury is uncertain.                    |
| Diarrhoea                                   | Odds Ratio: 3.99<br>(CI 95% 2.04 - 7.81)<br>Based on data from 370 patients in 4 studies  | <b>67</b><br>per 1000                                                | <b>223</b><br>per 1000 | <b>Low</b><br>Due to very serious imprecision <sup>7</sup>                               | Lopinavir/ritonavir may increase the risk of diarrhoea.                                   |
| Nausea and/or vomiting                      | Odds Ratio: 6.63<br>(CI 95% 3.25 - 13.54)<br>Based on data from 370 patients in 4 studies | <b>17</b><br>per 1000                                                | <b>103</b><br>per 1000 | <b>Low</b><br>Due to very serious imprecision <sup>7</sup>                               | Lopinavir/ritonavir may increase the risk of nausea and vomiting.                         |

|                                       |                                                                                            |                                                                     |                |                                                                                                |                                                                  |
|---------------------------------------|--------------------------------------------------------------------------------------------|---------------------------------------------------------------------|----------------|------------------------------------------------------------------------------------------------|------------------------------------------------------------------|
| Fatigue                               | Odds Ratio: 1.6<br>(CI 95% 0.54 - 4.75)<br>Based on data from 254<br>patients in 2 studies | 54<br>per 1000                                                      | 84<br>per 1000 | <b>Very Low</b><br>Due to very serious<br>imprecision and serious risk<br>of bias <sup>6</sup> | The effect of<br>lopinavir/ritonavir on<br>fatigue is uncertain. |
|                                       |                                                                                            | Difference: <b>30 more per 1000</b><br>(CI 95% 24 fewer - 159 more) |                |                                                                                                |                                                                  |
| Cognitive<br>dysfunction/deliri<br>um | NR                                                                                         | NR                                                                  |                | <b>NA</b>                                                                                      | NA                                                               |
|                                       |                                                                                            | NR                                                                  |                |                                                                                                |                                                                  |

NR: Not reported; NA: Not applicable

- Risk of bias: Not serious. Indirectness: Serious** as studies used change in serum creatinine rather than patient-important measures of acute kidney injury (i.e. renal replacement therapy requirement). **Imprecision: Serious.** Using a threshold of 15 per 1000, confidence intervals include important risk increase.
- Risk of bias: Not serious. Indirectness: Serious** as this outcome was not collected systematically, and the definition of cognitive dysfunction/delirium was not specified. **Imprecision: Serious.** Using a threshold of 15 per 1000, confidence intervals include important risk increase.
- Risk of bias: Data primarily from unblinded studies, but we would expect that patients would be more closely monitored for cardiac toxicity in trials than in usual clinical practice. Therefore, we expect the risk of cardiac toxicity to be higher in usual clinical practice. Indirectness: Not serious.** Trials measured cardiac toxicity differently in different trials. **Imprecision: Serious.** Confidence intervals include no effect.
- Risk of bias: Serious.** Most of the evidence is from unblinded trials, we didn't downgrade for RoB as our concerns were mitigated by a large effect size and indirect evidence showing consistent results. **Imprecision: OIS not met.**
- As there were no events in the control arms of included studies, we used the baseline risk estimated for Lopinavir/ritonavir vs. SOC comparison for the same outcome.
- Risk of bias: Serious.** Most of the evidence is from unblinded trials. **Imprecision: Very serious.** Very small number of events.
- Risk of bias: Serious.** Most of the evidence is from unblinded trials; we did not downgrade for RoB as our concerns were mitigated by a large effect size and indirect evidence showing consistent results.; **Imprecision: Very serious.** Very small number of events.
